# Supplementary material
Source: MDPI journal article supplement (https://www.mdpi.com/2071-1050/15/16/12645)
Supplement: s1 [file s1 › sustainability-2537957-SI.pdf]

Table S1. Questions on disinfectant knowledge and accuracy rate

| No.                                                                                                | Questions                                                                                                                                                                                                                                          | Answer | Accuracy Rate |
|----------------------------------------------------------------------------------------------------|----------------------------------------------------------------------------------------------------------------------------------------------------------------------------------------------------------------------------------------------------|--------|---------------|
| 1                                                                                                  | When disinfecting everyday surfaces, sodium hypochlorite (commonly known as household bleach) is recommended at an effective concentration of 0.05% (500 ppm) for a contact time of at least <b>10 minutes</b> <b>[5 minutes]*</b> .               | False  | 42.3%         |
| 2                                                                                                  | When disinfecting surfaces in patient areas and restrooms, sodium hypochlorite (household bleach) is recommended at an effective concentration of 0.1% (1000 ppm) for a contact time of at least 1-minute.                                         | True   | 70.2%         |
| 3                                                                                                  | When disinfecting everyday surfaces and patient areas, fourth-grade ammonium compounds such as benzalkonium chloride are recommended at an effective concentration of <b>1%</b> <b>[0.05-0.5%]</b> for a contact time of approximately 10 minutes. | False  | 38.1%         |
| 4                                                                                                  | When disinfecting everyday surfaces and patient areas, ethanol is recommended at an effective concentration of 70-90% for a contact time of about 1 minute.                                                                                        | True   | 71.6%         |
| 5                                                                                                  | When disinfecting everyday surfaces and patient areas, hydrogen peroxide is recommended at an effective concentration of 0.5% for a contact time of at least 5 minutes.                                                                            | True   | 61.4%         |
| 6                                                                                                  | When disinfecting everyday surfaces and patient areas, chlorhexidine is recommended at an effective concentration of 0.12% for a contact time of at least 30 seconds.                                                                              | True   | 59.1%         |
| 7                                                                                                  | When disinfecting everyday surfaces and patient areas, isopropyl alcohol is recommended at an effective concentration of 50% for a contact time of about <b>15 minutes</b> <b>[1 minute]</b> .                                                     | False  | 44.7%         |
| *The incorrect part of the sentence is marked in bold, and the correct answer is specified in [ ]. |                                                                                                                                                                                                                                                    |        |               |
